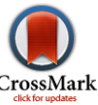

# Protection of Retina by $\alpha$ B Crystallin in Sodium Iodate Induced Retinal Degeneration

Peng Zhou<sup>1</sup>, Ram Kannan<sup>1</sup>, Christine Spee<sup>3</sup>, Parameswaran G. Sreekumar<sup>1</sup>, Guorui Dou<sup>1</sup>, David R. Hinton<sup>2,3\*</sup>

<sup>1</sup> Doheny Eye Institute, Los Angeles, California, United States of America, <sup>2</sup> Departments of Pathology, Keck School of Medicine of the University of Southern California, Los Angeles, California, United States of America, <sup>3</sup> Ophthalmology, Keck School of Medicine of the University of Southern California, Los Angeles, California, United States of America

## Abstract

Age-related macular degeneration (AMD) is a leading cause of blindness in the developed world. The retinal pigment epithelium (RPE) is a critical site of pathology in AMD and  $\alpha$ B crystallin expression is increased in RPE and associated drusen in AMD. The purpose of this study was to investigate the role of  $\alpha$ B crystallin in sodium iodate (NaIO<sub>3</sub>)-induced retinal degeneration, a model of AMD in which the primary site of pathology is the RPE. Dose dependent effects of intravenous NaIO<sub>3</sub> (20-70 mg/kg) on development of retinal degeneration (fundus photography) and RPE and retinal neuronal loss (histology) were determined in wild type and  $\alpha$ B crystallin knockout mice. Absence of  $\alpha$ B crystallin augmented retinal degeneration in low dose (20 mg/kg) NaIO<sub>3</sub>-treated mice and increased retinal cell apoptosis which was mainly localized to the RPE layer. Generation of reactive oxygen species (ROS) was observed with NaIO<sub>3</sub> in mouse and human RPE which increased further after  $\alpha$ B crystallin knockout or siRNA knockdown, respectively. NaIO<sub>3</sub> upregulated AKT phosphorylation and peroxisome proliferator-activator receptor- $\gamma$  (PPAR <sub>$\gamma$</sub> ) which was suppressed after  $\alpha$ B crystallin siRNA knockdown. Further, PPAR <sub>$\gamma$</sub>  ligand inhibited NaIO<sub>3</sub>-induced ROS generation. Our data suggest that  $\alpha$ B crystallin plays a critical role in protection of NaIO<sub>3</sub>-induced oxidative stress and retinal degeneration in part through upregulation of AKT phosphorylation and PPAR <sub>$\gamma$</sub>  expression.

**Citation:** Zhou P, Kannan R, Spee C, Sreekumar PG, Dou G, et al. (2014) Protection of Retina by  $\alpha$ B Crystallin in Sodium Iodate Induced Retinal Degeneration. PLoS ONE 9(5): e98275. doi:10.1371/journal.pone.0098275

**Editor:** Raghavan Raju, Georgia Regents University, United States of America

**Received:** January 26, 2014; **Accepted:** April 29, 2014; **Published:** May 29, 2014

**Copyright:** © 2014 Zhou et al. This is an open-access article distributed under the terms of the Creative Commons Attribution License, which permits unrestricted use, distribution, and reproduction in any medium, provided the original author and source are credited.

**Funding:** Supported in part by grants EY01545 (DRH) and by core grant EY03040, the Arnold and Mabel Beckman Foundation, and an unrestricted grant to the Department of Ophthalmology from Research to Prevent Blindness Inc., New York, NY. The funders had no role in study design, data collection and analysis, decision to publish, or preparation of the manuscript.

**Competing Interests:** The authors have declared that no competing interests exist.

\* E-mail: dhinton@usc.edu

## Introduction

Age-related macular degeneration (AMD) is characterized by progressive degeneration of the macular region of the retina resulting in loss of central vision. AMD is the leading cause of irreversible blindness in the developed world [1]. Clinically, AMD manifests in two forms; a non-exudative dry form and an exudative, neovascular wet form [1,2]. Geographic atrophy (GA) is an advanced form of dry AMD with extensive atrophy and loss of the retinal pigment epithelium (RPE) and overlying photoreceptors and is responsible for 10–20% of cases of legal blindness from AMD [3,4]. At present, there is no available effective treatment for GA.

A number of murine models have been generated that simulate features of dry AMD including RPE degeneration, lipofuscin accumulation, subretinal deposits, and loss of photoreceptors [5–12]. Our laboratory recently showed that bone morphogenetic protein-4 (BMP-4) is highly expressed in dry AMD and mediates oxidative stress-induced senescence in RPE in in vitro dry AMD thus serving as a molecular switch between atrophic and neovascular AMD [13,14]. Localized RPE debridement or genetic ablation of RPE can lead to a profound reduction in RPE cells and consequent loss of photoreceptors [15]. Retinotoxicity can also be induced by endogenous and exogenous agents

in laboratory animals. Mice receiving polyinosine-polycytidylic acid (Poly I: C) had morphological changes similar to that of humans with dry ARMD exhibiting soft and/or hard drusen, GA [16]. Recently, the conditional ablation of the microRNA processing enzyme DICER1 was shown to induce RPE degeneration in mice [17]. Genetic or pharmacological inhibition of inflammasome components (NLRP3, MYD88) was reported to prevent RPE degeneration induced by DICER1 loss or AluRNA exposure [18]. While most of the animal models for GA mentioned above are long-term involving prolonged treatment regimens, the NaIO<sub>3</sub>-induced retinal degeneration model has proven to be a convenient and widely used model, because it is rapid, reproducible and has a primary site of pathology in the RPE [6,19–22]. Thus, in the present study, we have utilized the NaIO<sub>3</sub> model in 129S6/SvEvTac mice to study mechanisms of retinal degeneration.

Crystallins are members of the small heat shock protein (sHSP) family, and  $\alpha$ B crystallin has been found to have high chaperone efficiency, and bind misfolded proteins with high affinity and stoichiometry [23]. An increased expression of  $\alpha$ B crystallin was found in RPE and associated drusen in dry AMD [24,25]. Both  $\alpha$ A and  $\alpha$ B crystallin are expressed in the mouse retina [26–28]. Mice lacking  $\alpha$ B crystallin have provided considerable insights into

the functional roles of this protein [29]. Our laboratory has shown that RPE cells from mice lacking  $\alpha$ B crystallin are more susceptible to oxidative and endoplasmic reticulum stress as compared to wild type RPE [28,30,31]. Further we found that RPE cells overexpressing  $\alpha$ B crystallin showed resistance to apoptosis, suggesting that  $\alpha$ B crystallin may prevent stress-induced cell death [32]. Recently, evidence for the secretion of  $\alpha$ B crystallin by RPE exosomes and protection of neighboring photoreceptors and RPE by exogenous  $\alpha$ B crystallin was presented by our laboratory [33] suggesting that  $\alpha$ B crystallin has significant potential in retinal therapy.

This study was undertaken to investigate the role of  $\alpha$ B crystallin in a model of  $\text{NaIO}_3$  induced retinal degeneration in 129S6/SvEvTac mice. Further, using cultured mouse and human RPE cells, we also investigated the mechanism of regulation of cell death from  $\text{NaIO}_3$ -induced oxidative stress by  $\alpha$ B crystallin. Our major finding is that absence of  $\alpha$ B crystallin in  $\alpha$ B crystallin knockout mice causes more severe degeneration of the retina in  $\text{NaIO}_3$ -treated mice as compared to wild type mice treated with  $\text{NaIO}_3$ . Further, our studies also suggest that  $\alpha$ B crystallin plays a critical role in protection of  $\text{NaIO}_3$ -induced oxidative stress and retinal degeneration in part through upregulation of AKT phosphorylation and PPAR $_{\gamma}$  expression.

## Results

### Selection of optimal *in vivo* dose and duration of $\text{NaIO}_3$ treatment

Preliminary experiments were performed to select an optimal dosage of  $\text{NaIO}_3$  that was used in all subsequent *in vivo* experiments in mice. We tested the effect of a single intravenous injection of 20, 35, 50 and 70 mg/kg  $\text{NaIO}_3$  for 1, 2 and 3 weeks on retinal morphology. The histologic data from varying doses of  $\text{NaIO}_3$  treatment are presented in Figure 1.  $\text{NaIO}_3$ -induced retinal degeneration increased with the dose. The extent of degeneration was absent to mild with 20 mg/kg, moderate with 35 and 50 mg/kg and was severe with 70 mg/kg dose 3 week after  $\text{NaIO}_3$  treatment (Figure 1). We chose the 20 mg/kg  $\text{NaIO}_3$  dose that produced no more than mild degeneration in all our subsequent experiments to enable studying the exacerbating effects of  $\alpha$ B crystallin knockout on retinal damage (see below). While high doses of  $\text{NaIO}_3$  resulted in retinal degeneration as early as 1 week post-injection, the low dose (20 mg/kg)  $\text{NaIO}_3$  showed damage localized to the RPE at the 3 week time-point (Fig S1).

### Fundus photography shows accelerated $\text{NaIO}_3$ -induced retinal degeneration in $\alpha$ B crystallin knockout mice

To determine the extent of  $\text{NaIO}_3$ -induced retinal degeneration, we compared the fundus photographs of mice from PBS-treated WT,  $\text{NaIO}_3$ -treated WT, PBS-treated  $\alpha$ B crystallin knockout, and  $\text{NaIO}_3$ -treated  $\alpha$ B crystallin knockout groups at the end of 3 weeks. The dose of  $\text{NaIO}_3$  in these studies was 20 mg/kg. The retinal degeneration induced by  $\text{NaIO}_3$  in mice appeared as patchy white retinal lesions when observed by fundus photography (Fig. 2).

The fundus photographs of thirteen out of fourteen  $\text{NaIO}_3$ -treated  $\alpha$ B crystallin knockout mice showed patchy retinal degeneration three weeks after injection (Fig. 2D, E). Only three out of fourteen eyes of  $\text{NaIO}_3$ -treated wild type mice showed retinal degeneration (Fig 2B, E). Thus, the difference in the

number of mice with retinal degeneration between  $\text{NaIO}_3$ -treated  $\alpha$ B crystallin knockout mice and  $\text{NaIO}_3$ -treated wild type mice was highly significant ( $P < 0.001$ ). No apparent degeneration could be seen in control, untreated wild type or  $\alpha$ B crystallin knockout retina.

### Histopathology shows accelerated $\text{NaIO}_3$ -induced degeneration in $\alpha$ B crystallin knockout mice

The primary site of pathology after  $\text{NaIO}_3$  injection (20 mg/kg) was the RPE layer; we observed that the RPE layer was discontinuous and damaged in all  $\alpha$ B crystallin knockout mice, while only two out of seven wild type mice showed these changes in the RPE (Fig. 3). Using TUNEL staining we confirmed that with  $\text{NaIO}_3$  (20 mg/kg; 3 week time point) cell death was localized to the RPE layer in the  $\alpha$ B crystallin knockout mice (Figure S2). Significant differences were found between  $\text{NaIO}_3$ -treated wild type mice and  $\text{NaIO}_3$ -treated  $\alpha$ B crystallin knockout mice in the extent of RPE degeneration ( $P < 0.01$ ). Retinas from  $\alpha$ B crystallin knockout mice (Fig. 3D) revealed more severe degeneration from  $\text{NaIO}_3$  injection as compared to wild-type retinas (Fig. 3B). Total retinal thickness was significantly decreased ( $P < 0.01$ ) in  $\alpha$ B crystallin knockout mice with  $\text{NaIO}_3$  treatment as compared to untreated  $\alpha$ B crystallin knockout group ( $P < 0.01$ ). In contrast, in wild type mice, no significant difference in retinal thickness after treatment with  $\text{NaIO}_3$  was found vs. untreated controls. (Fig. 3F). An assessment of the localization of retinal damage by  $\text{NaIO}_3$  was made by counting the number of nuclei in the inner nuclear layer (INL), outer nuclear layer (ONL) and ganglion cell layer (GCL) of wild type and  $\alpha$ B crystallin knockout retina (Fig. 3G–I). This analysis revealed that the loss of nuclei was more prominent at 3 weeks post- $\text{NaIO}_3$  injection in  $\alpha$ B crystallin knockout retina vs. that of wild type. The number of nuclei per unit area showed a significant decrease with  $\text{NaIO}_3$  injection in the ONL of  $\alpha$ B crystallin knockout mice which was statistically significant ( $P < 0.01$ ; Fig. 3I). No significant differences in the number of nuclei in any of the other nuclear layers (GCL, INL) were found between the  $\text{NaIO}_3$ -injected and PBS-injected groups of wild type mice (Fig. 3-G,H).

### Reduced ERG amplitudes in $\text{NaIO}_3$ -treated $\alpha$ B crystallin knockout mice

To determine whether the absence of  $\alpha$ B crystallin had an effect on the retinal function of  $\text{NaIO}_3$ -treated mice, we compared mesopic (mixed rod and cone) ERG responses. These studies to assess the functional response of neural retina were performed in four groups of mice (PBS-treated WT,  $\text{NaIO}_3$ -treated WT, PBS-treated  $\alpha$ B crystallin knockout, and  $\text{NaIO}_3$ -treated  $\alpha$ B crystallin knockout) that received a dose of 20 mg/kg  $\text{NaIO}_3$  at the end of 3 weeks. Significant differences were observed in the ERGs of  $\text{NaIO}_3$ -treated  $\alpha$ B crystallin knockout mice compared with the PBS-treated  $\alpha$ B crystallin knockout mice (Fig 4A). The amplitude of the *a* wave of the ERG, that originates from the photoreceptors, of  $\text{NaIO}_3$ -treated  $\alpha$ B crystallin knockout mice decreased by 68.3% compared with that of PBS-treated  $\alpha$ B crystallin knockout mice (Fig 4B). The amplitude of the *b* wave of the ERG, (that originates from the bipolar cells), of  $\text{NaIO}_3$ -treated  $\alpha$ B crystallin knockout mice decreased by 55.3% compared with that of PBS-treated  $\alpha$ B crystallin knockout mice (Fig 4C). No significant differences were found between the ERGs of the  $\text{NaIO}_3$ -treated and control wild type mice at this low dose (Fig 4B,C).

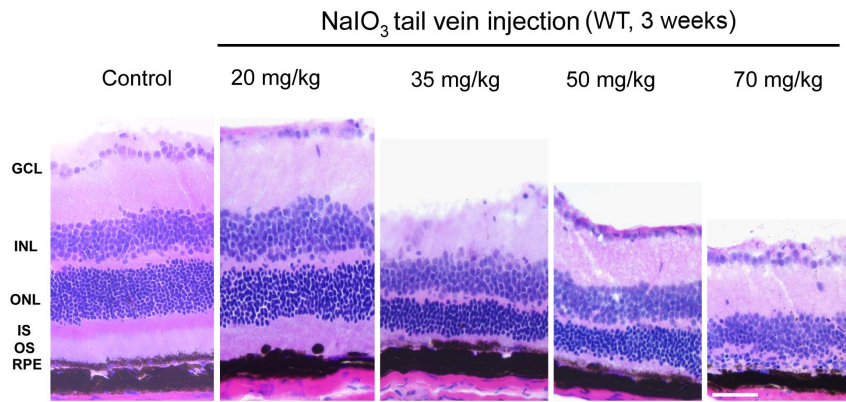

**Figure 1. H & E staining of retina showing dose dependent effect of NaIO<sub>3</sub> in 129S6/SvEvTac wild type (WT) mice.** The intravenous NaIO<sub>3</sub> doses used were 20, 35, 50 and 70 mg/kg body weight. Mice were euthanized after 3 weeks of treatment, eyes were enucleated, frozen sections of retina were obtained, and H & E staining was performed. Most mice treated with 20 mg/kg showed an intact layer of contiguous RPE although occasional mice showed focal RPE degeneration and loss at the end of 3 weeks (as shown in this figure). The higher doses showed moderate and severe damage to the RPE cell layer, and outer nuclear layer. GCL: ganglion cell layer; ONL: outer nuclear layer; INL: inner nuclear layer; IS: inner segment; OS: outer segment. Bar equals 75  $\mu$ m. doi:10.1371/journal.pone.0098275.g001

#### Increased production of reactive oxygen species (ROS) in $\alpha$ B crystallin knockout RPE and cultured human RPE cells transfected with $\alpha$ B crystallin siRNA after NaIO<sub>3</sub> treatment

These experiments were performed in both mouse and human RPE cultured in 0.5% FBS-containing DMEM; cells were treated with 200  $\mu$ g/ml NaIO<sub>3</sub> for 24 h. Treatment with NaIO<sub>3</sub> induced ROS production in RPE from WT mice which was not found in untreated controls (Fig. 5A–B). ROS partially co-localized with mitochondria. The ROS production was even higher in  $\alpha$ B crystallin knockout RPE after NaIO<sub>3</sub> treatment (arrows, Fig. 5D). Negligible ROS was produced in  $\alpha$ B crystallin knockout RPE without NaIO<sub>3</sub> (Fig. 5C). To further evaluate the effect of NaIO<sub>3</sub> on ROS production, we studied primary human RPE cells after  $\alpha$ B crystallin knockdown. The percentage of knockdown of  $\alpha$ B crystallin in human RPE by siRNA transfection was about 80% as determined by Western blot analysis (Fig. 5E). Treatment with NaIO<sub>3</sub> resulted in a pronounced intracellular generation of ROS that was predominantly localized to the mitochondria in  $\alpha$ B crystallin siRNA-transfected RPE cells (Fig. 5I–K). However, the staining for ROS was much less prominent in NaIO<sub>3</sub>-treated RPE cells with scrambled siRNA (Fig. 5F–H). Thus, these results show that knockout or siRNA knockdown of  $\alpha$ B crystallin results in increased generation of ROS in RPE cells treated with NaIO<sub>3</sub>.

#### Mode of cell death in RPE exposed to low dose of NaIO<sub>3</sub> is not by necrosis

Propidium iodide (PI) staining was performed to assess necrotic features in RPE cells incubated with different doses of NaIO<sub>3</sub>. The NaIO<sub>3</sub> treatment of RPE was performed for 24 h in 0.5% FBS-containing DMEM at doses of 200, 500, or 1000  $\mu$ g/ml, respectively. Confocal microscopy images are presented in Fig. 6 (A–H) that show PI staining in control (scrambled siRNA) RPE nuclei (Fig. 6A–D) and  $\alpha$ B crystallin siRNA-transfected RPE nuclei (Fig. 6E–H) with or without NaIO<sub>3</sub> treatment. No significant differences were found in the number of PI positive cells between control group and the group treated with 200  $\mu$ g/ml of NaIO<sub>3</sub> in both scrambled siRNA and  $\alpha$ B crystallin siRNA-transfected human RPE cells. Treatment with 500 and 1000  $\mu$ g/ml of NaIO<sub>3</sub> resulted in increased PI positive cells both in

scrambled siRNA RPE and  $\alpha$ B crystallin siRNA pretreated RPE ( $P < 0.01$ ). However, no significant differences were found between the number of PI positive cells in control RPE and  $\alpha$ B crystallin siRNA-transfected groups (Fig. 6I). Therefore, it can be concluded that high dose NaIO<sub>3</sub> (500  $\mu$ g/ml and 1000  $\mu$ g/ml) induced predominantly RPE cell necrosis, while induction of necrosis was negligible or insignificant with low dose NaIO<sub>3</sub> (200  $\mu$ g/ml).

#### Increased apoptosis in $\alpha$ B crystallin siRNA-transfected RPE with low dose NaIO<sub>3</sub>

TUNEL staining was performed to assess the extent of apoptosis with NaIO<sub>3</sub> in RPE cells. Fig. 7 shows TUNEL staining in control RPE cells (Fig. 7A–B) and  $\alpha$ B crystallin siRNA-transfected RPE cells (Fig. 7C–D) treated with a low dose (200  $\mu$ g/ml) of NaIO<sub>3</sub>. The duration of NaIO<sub>3</sub> exposure of RPE in 0.5% FBS-containing DMEM was 24 h. Treatment with 200  $\mu$ g/ml NaIO<sub>3</sub> resulted in increased TUNEL-positive cells with  $\alpha$ B crystallin siRNA-transfection as compared with scrambled siRNA controls (Fig. 7E) ( $P < 0.01$ ). However, no significant difference was found between control and NaIO<sub>3</sub>-treated RPE cells without  $\alpha$ B crystallin siRNA-transfection. Thus NaIO<sub>3</sub> induces apoptosis in  $\alpha$ B crystallin siRNA-transfected RPE cells that were exposed to low doses.

#### Increased caspase 3 activation with NaIO<sub>3</sub> and $\alpha$ B crystallin siRNA

Cleaved caspase 3 staining was performed to confirm that the mechanism of cell death was by apoptosis. Fig. 8 shows immunostaining of cleaved caspase 3 in control human RPE cells (Fig. 8A–B) and  $\alpha$ B crystallin siRNA-transfected RPE cells (Fig. 8C–D) treated with low dose NaIO<sub>3</sub>. The duration and dose of NaIO<sub>3</sub> exposure of RPE in 0.5% FBS-containing DMEM was 24 h and 200  $\mu$ g/ml. Treatment of RPE cells with 200  $\mu$ g/ml NaIO<sub>3</sub> resulted in an increase in the number of cleaved caspase 3-positive cells with  $\alpha$ B crystallin siRNA-transfection as compared to scrambled siRNA controls (Fig. 8E) ( $P < 0.01$ ). However, no significant difference was found between control and NaIO<sub>3</sub> treated RPE cells without  $\alpha$ B crystallin siRNA-transfection. This indicates that apoptosis with low dose NaIO<sub>3</sub> (200  $\mu$ g/ml) in  $\alpha$ B crystallin siRNA-transfected RPE cells occurs via caspase 3 activation.

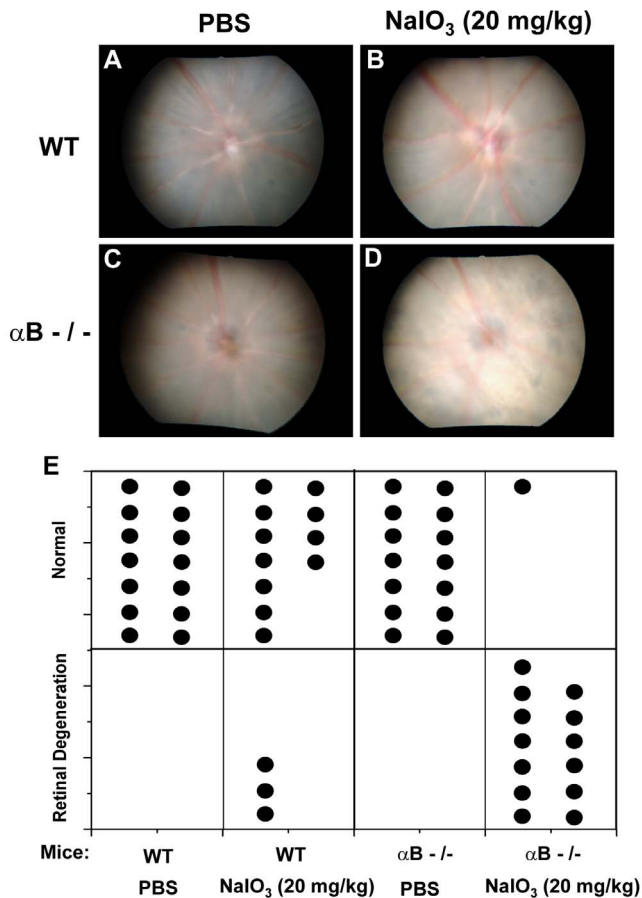

**Figure 2. Fundus photograph of control and NaIO<sub>3</sub>-treated  $\alpha$ B crystallin knockout mice ( $\alpha$ B<sup>-/-</sup>).** Three weeks after tail vein injection of 20 mg/kg NaIO<sub>3</sub>, fundus photograph was taken in PBS-treated wild type (WT) (A), NaIO<sub>3</sub>-treated WT (B), PBS-treated  $\alpha$ B<sup>-/-</sup> (C), and NaIO<sub>3</sub>-treated  $\alpha$ B<sup>-/-</sup> (D) mice. Arrows indicate sites of retinal degeneration. Thirteen NaIO<sub>3</sub>-treated  $\alpha$ B<sup>-/-</sup> mice showed patchy retinal degeneration three weeks after NaIO<sub>3</sub> injection (E). Only three out of fourteen eyes of NaIO<sub>3</sub>-treated WT mice showed retinal degeneration (E). A statistically significant difference was found between NaIO<sub>3</sub>-treated  $\alpha$ B<sup>-/-</sup> and NaIO<sub>3</sub>-treated WT mice ( $P < 0.001$ ). doi:10.1371/journal.pone.0098275.g002

### Signaling molecules associated with NaIO<sub>3</sub>-induced RPE cell death

We investigated the mechanism of the exacerbation of NaIO<sub>3</sub>-induced RPE cell apoptosis in the absence of  $\alpha$ B crystallin by analyzing several apoptotic signaling proteins (Fig. 9). Expression of phosphorylated AKT at serine 473 increased after treatment with low dose (200  $\mu$ g/ml) NaIO<sub>3</sub> (Fig. 9B). However, the increase of phospho-AKT was much lower in  $\alpha$ B crystallin siRNA-transfected RPE cells treated with NaIO<sub>3</sub> compared to controls. A similar trend was observed for phospho-GSK 3 $\beta$  and phosphorylated -c-Raf, signaling proteins downstream of AKT. Low dose NaIO<sub>3</sub> markedly increased PPAR $\gamma$  expression in scrambled transfected RPE cells, while this increase could not be seen in  $\alpha$ B crystallin siRNA-transfected RPE cells (Fig. 9C). However, no significant changes were evident with NaIO<sub>3</sub> treatment in phospho-PDK1, a kinase upstream of AKT (Fig. 9A). This suggests that AKT may be the point of interaction with NaIO<sub>3</sub> in the AKT signaling pathway (Fig. 9A).

The treatment with low dose (200  $\mu$ g/ml) NaIO<sub>3</sub> increased PPAR $\gamma$  expression in RPE. The increased expression of PPAR $\gamma$

possibly exerts a reactive protective role, as we observed A-PAF, a PPAR $\gamma$  ligand, significantly decreased the generation of ROS (Fig. 10A). On the other hand, GW9662, a PPAR $\gamma$  antagonist, caused a significant increase in NaIO<sub>3</sub>-induced production of ROS ( $P < 0.01$ ; Fig. 10B). The increase in PPAR $\gamma$  by NaIO<sub>3</sub> was attenuated in NaIO<sub>3</sub>-treated  $\alpha$ B crystallin siRNA-transfected RPE cells thereby compromising the protective defense by PPAR $\gamma$  under these conditions (Fig. 10A, B).

### Discussion

In an attempt to understand the protective role of  $\alpha$ B crystallin in stress-induced RPE degeneration, we have investigated the effect of suppression of  $\alpha$ B crystallin on apoptosis and have studied the signaling mechanisms associated with this phenomenon. For this purpose, we used a murine model of NaIO<sub>3</sub>-induced retinal degeneration *in vivo* and cell death in human RPE *in vitro*.

NaIO<sub>3</sub> has been previously shown to induce selective degeneration of the RPE and consequent retinal degeneration [6,19,20]. A low dose of NaIO<sub>3</sub> was used to induce retinal degeneration in this study. No significant retinal degeneration was found on fundus photography in wild type mice three weeks after tail vein injection of low dose NaIO<sub>3</sub>, while 93.7% (15/16) eyes of  $\alpha$ B crystallin knockout mice exhibited retinal degeneration after the same treatment. A much higher dose and duration of treatment (100 mg/kg NaIO<sub>3</sub>; 6 weeks) was required in ICR strain of mice to induce changes in morphology in the retina [21] indicating that differences among mouse strains can also play a role [19–21]. Furthermore, previous ultrastructural and TUNEL labeling studies showed that RPE cell death induced by 100 mg/kg NaIO<sub>3</sub> was from necrosis and that of the photoreceptors was from apoptosis [21]. In the present study, increased RPE apoptosis was found in low dose NaIO<sub>3</sub>-treated RPE cells from  $\alpha$ B crystallin knockout mice and in human RPE after  $\alpha$ B crystallin knockdown; however, necrosis was minimal. Necrotic cells increased in a dose dependent manner with high dose of NaIO<sub>3</sub>. Therefore, we may conclude that low dose of NaIO<sub>3</sub> induces RPE cell apoptosis, while high dose of NaIO<sub>3</sub> results in RPE cell necrosis.

The role of  $\alpha$ B crystallin in cellular protection is becoming increasingly important because  $\alpha$ B crystallin acts on a variety of cellular processes [23,27]. Newer studies have taken advantage of  $\alpha$ B crystallin's antiapoptotic and anti-inflammatory properties in devising therapy [34,35]. For example, intravenous administration of  $\alpha$ B crystallin in mice was found to reduce inflammation and thus play a protective role in experimental autoimmune demyelination [34,36].  $\alpha$ B crystallin may play an important role in protection of retinal neurons from damage by metabolic and environmental stress as seen by evidence of elevated crystallin expression in light damaged photoreceptors and in models of retinal degeneration [37,38].  $\alpha$ B crystallin could be important in the development of, or in response to, AMD since  $\alpha$ B crystallin was found to be accumulated in RPE, drusen and Bruch membrane tissues from AMD patients [23,24]. In a recent study, we found that  $\alpha$ B crystallin is secreted via exosomes by RPE cells and presented evidence for its extracellular function in protecting neighboring RPE cells and photoreceptors from oxidative injury [33].

In our present studies, we found that lack of  $\alpha$ B crystallin accelerated and augmented the retinal degeneration in NaIO<sub>3</sub>-treated mice *in vivo* and was associated with increased RPE cell apoptosis *in vitro*. In previous studies from our laboratories, we had reported that lack of  $\alpha$ B crystallin renders RPE cells more susceptible to apoptosis from oxidative stress induced by H<sub>2</sub>O<sub>2</sub> [28]. Similarly, when RPE cells were exposed to ER stress,

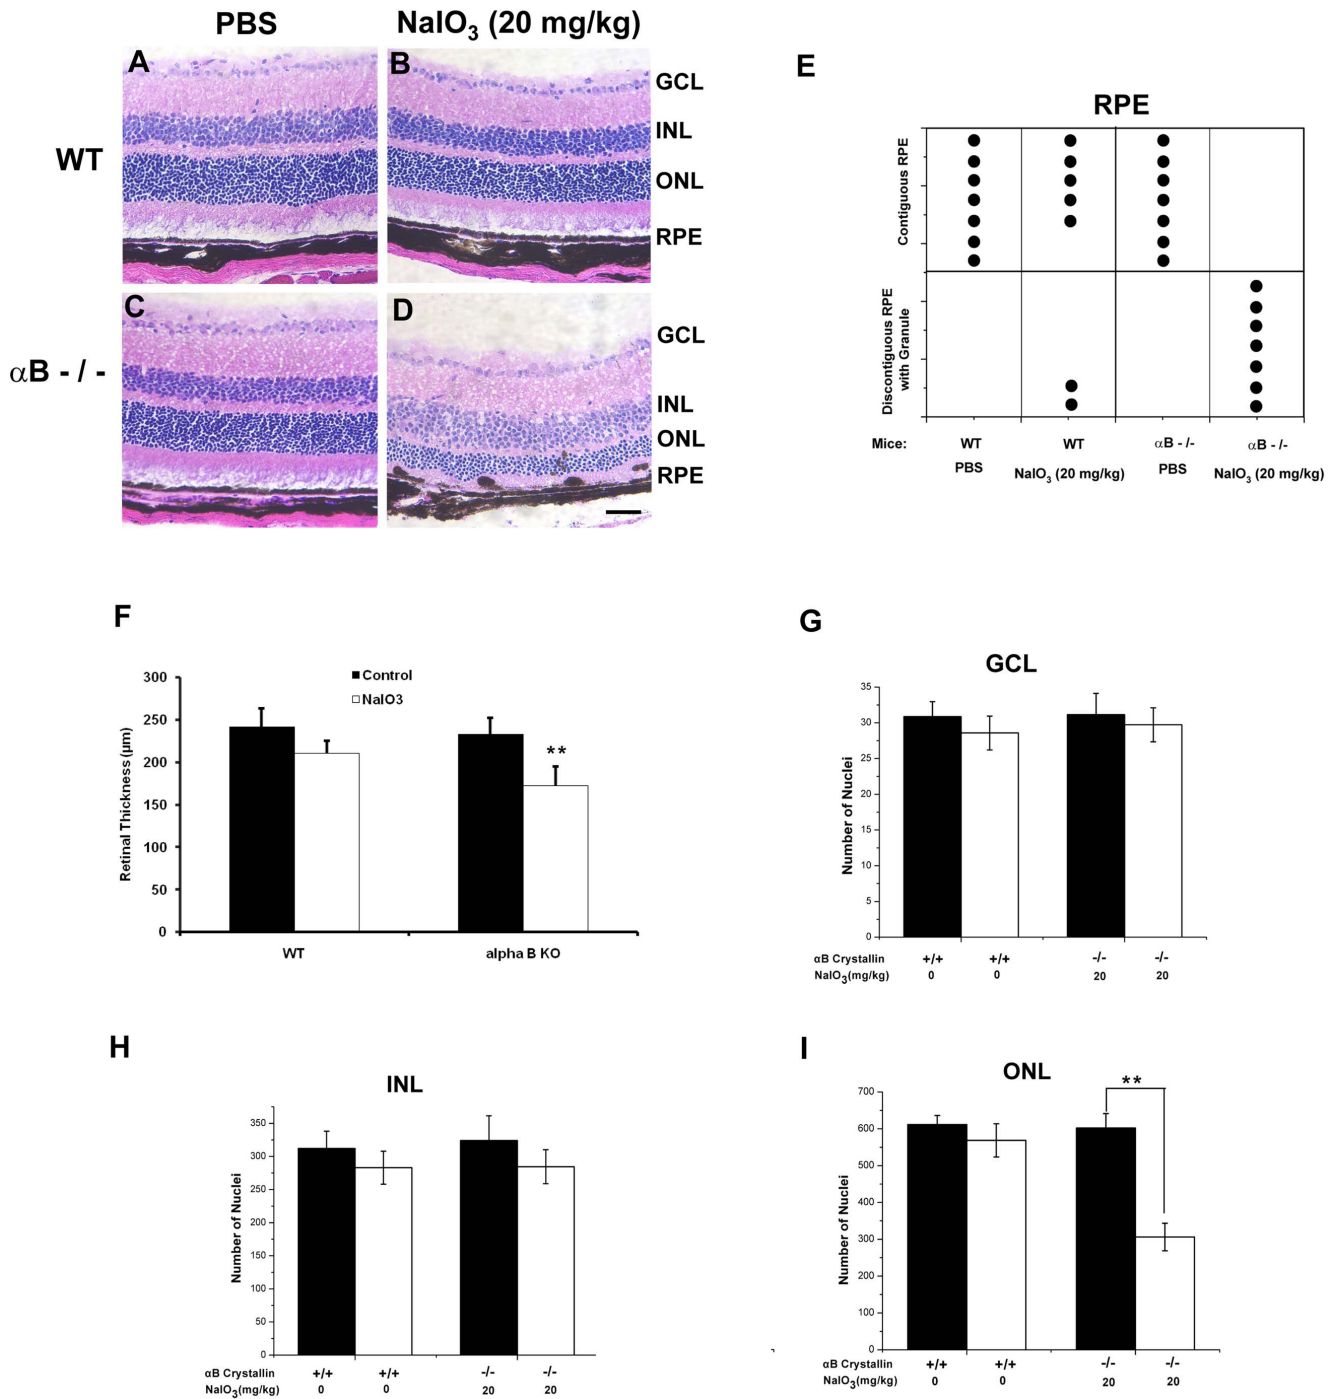

**Figure 3. Histopathology of retina from control and NaIO<sub>3</sub>-treated  $\alpha$ B crystallin knockout ( $\alpha$ B<sup>-/-</sup>) mice.** Three weeks after tail vein injection of 20 mg/kg NaIO<sub>3</sub>, eyes were enucleated and frozen sections were stained with H&E. The four experimental groups of mice were PBS-treated WT (A), NaIO<sub>3</sub>-treated WT (B), PBS-treated  $\alpha$ B<sup>-/-</sup> (C), and NaIO<sub>3</sub>-treated  $\alpha$ B<sup>-/-</sup> (D). The RPE layer in  $\alpha$ B<sup>-/-</sup> mice with NaIO<sub>3</sub> injection were discontiguous and damaged. Only two out of seven WT mice showed discontiguous and damaged RPE (E). Bar graph showing retinal thickness ( $\mu$ m) with and without NaIO<sub>3</sub> in WT and  $\alpha$ B<sup>-/-</sup> mice. (F). Retinal thickness was significantly lower ( $P < 0.01$ ) in NaIO<sub>3</sub> treated  $\alpha$ B<sup>-/-</sup> mice when compared to the corresponding WT group. No significant differences in the number of nuclei in the ganglion cell layer, outer nuclear layer or inner nuclear layer were found between the NaIO<sub>3</sub>-injected and PBS-injected WT mice (G–H). The number of nuclei per unit area in the outer nuclear layer of NaIO<sub>3</sub> injected  $\alpha$ B<sup>-/-</sup> mice showed a significant decrease ( $P < 0.01$ ) as compared to control without NaIO<sub>3</sub> injection (I). RPE: RPE cell layer; ONL: outer nuclear layer; INL: inner nuclear layer; GCL: ganglion cell layer. Data are mean  $\pm$  SEM,  $n = 7$ /group, \*\* $P < 0.01$ . Bar equals 75  $\mu$ m. doi:10.1371/journal.pone.0098275.g003

apoptosis ensues and  $\alpha$ B crystallin regulated ER-stress induced cell death [31]. Silencing of  $\alpha$ B crystallin by siRNA knockdown exacerbated apoptosis while overexpression attenuated apoptotic

cell death in RPE cells [30,31]. Our present data show that induction of apoptosis by NaIO<sub>3</sub> occurs through generation of

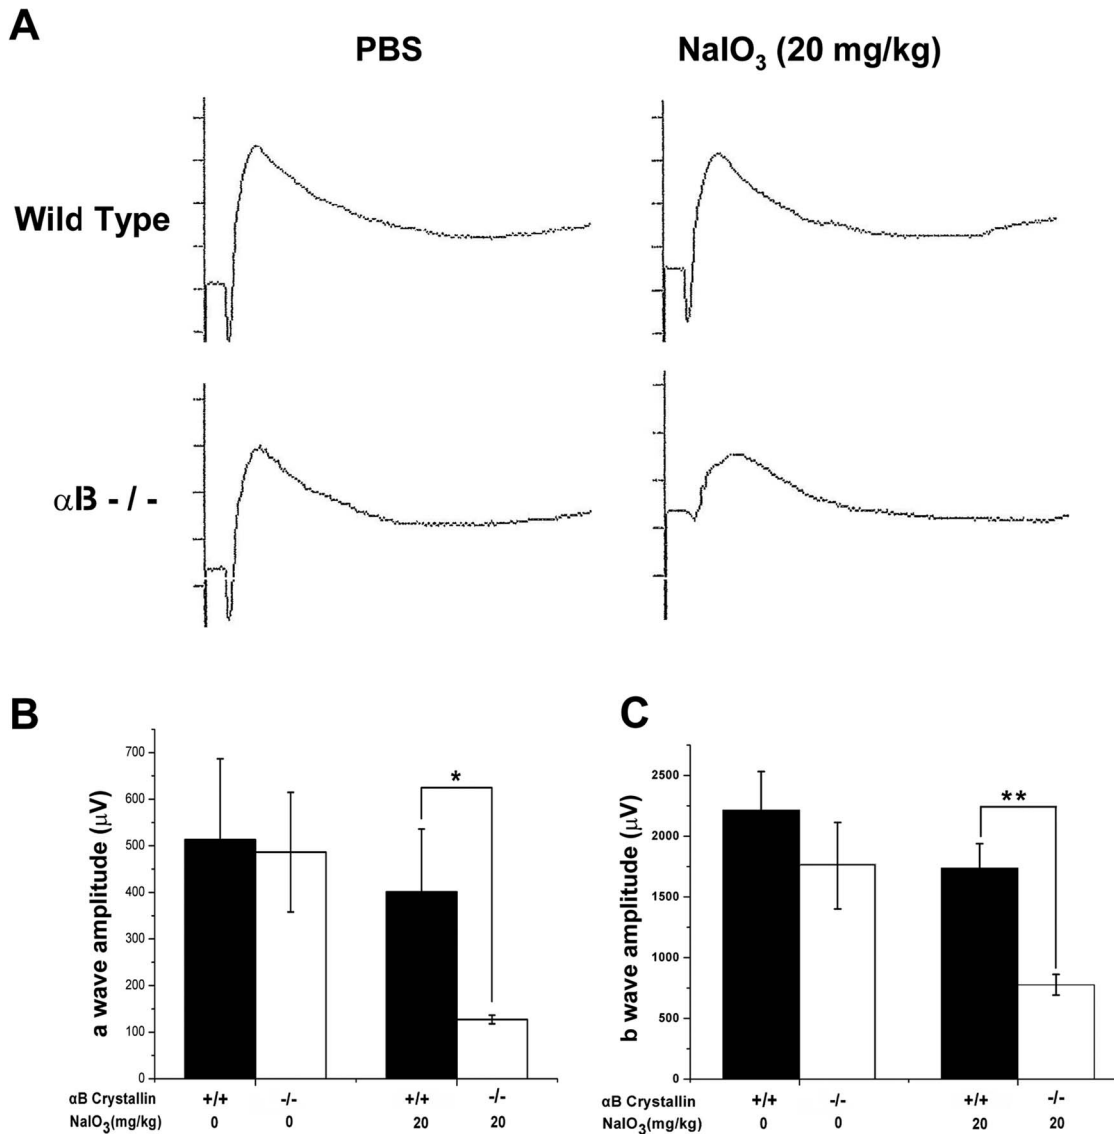

**Figure 4. Reduced ERG amplitudes in NaIO<sub>3</sub>-treated  $\alpha$ B crystallin knockout ( $\alpha$ B<sup>-/-</sup>) mice.** Three weeks after tail vein injection of 20 mg/kg body weight NaIO<sub>3</sub>, mesopic ERG responses were recorded in PBS-treated WT, NaIO<sub>3</sub>-treated WT, PBS-treated  $\alpha$ B<sup>-/-</sup>, and NaIO<sub>3</sub>-treated  $\alpha$ B<sup>-/-</sup> mice (representative ERGs shown in A). The amplitudes of a wave of the ERG of NaIO<sub>3</sub>-treated  $\alpha$ B<sup>-/-</sup> mice decreased by 68.3% compared with that of PBS-treated  $\alpha$ B<sup>-/-</sup> mice (B). The amplitudes of b wave of the ERG of NaIO<sub>3</sub>-treated  $\alpha$ B<sup>-/-</sup> mice decreased by 55.3%, compared with that of PBS-treated  $\alpha$ B<sup>-/-</sup> mice (C). Data are mean  $\pm$  SEM, n = 5/group, \*P < 0.05, \*\*P < 0.01. doi:10.1371/journal.pone.0098275.g004

ROS consistent with the known oxidative properties of iodate ions involving mitochondria [6,19,20].

In the  $\alpha$ B crystallin knockout mouse, knockout of the  $\alpha$ B crystallin gene also disrupted the closely related gene HSPB2 [29]. However, while HSPB2 is expressed in muscle tissues, our previous work established that HSPB2 is not expressed in normal or pathologic murine posterior eye cups, including the retina and RPE [29,39]. Therefore, loss of HSPB2 has no effect on the evaluation of  $\alpha$ B crystallin knockout in studies of retinal degeneration.

It was reported that there was no apparent phenotype in the retina of  $\alpha$ B crystallin knockout mice [29]; however, our recent studies found that while the histology of the neural retina was unaffected, there was a mild decrease in retinal vessel density in the inner plexiform layer in  $\alpha$ B crystallin knockout mice compared to wild type [39]. We found that absence of  $\alpha$ B crystallin

accelerated and augmented the degeneration of the retina in NaIO<sub>3</sub> treated mice in this study. Further, apoptosis was exacerbated in RPE after  $\alpha$ B crystallin siRNA knockdown. For example, we observed increased production of ROS in RPE cells from  $\alpha$ B crystallin knockout mice and human RPE cells transfected with  $\alpha$ B crystallin siRNA upon NaIO<sub>3</sub> treatment. These results suggest that while an apparent retinal phenotype could not be found *in vivo* in normal conditions, suppression of  $\alpha$ B crystallin does indeed cause injury and death at a cellular level in RPE after oxidative stress. Furthermore, the mode of cell death was via apoptosis and necrosis was not seen in RPE cells treated with low NaIO<sub>3</sub> doses.

It is of interest that very recently it was shown that knockout of  $\alpha$ A crystallin also exacerbates retinal degeneration in the NaIO<sub>3</sub> model [40]. We have previously shown that  $\alpha$ B crystallin is expressed at much higher levels in RPE than  $\alpha$ A crystallin but that

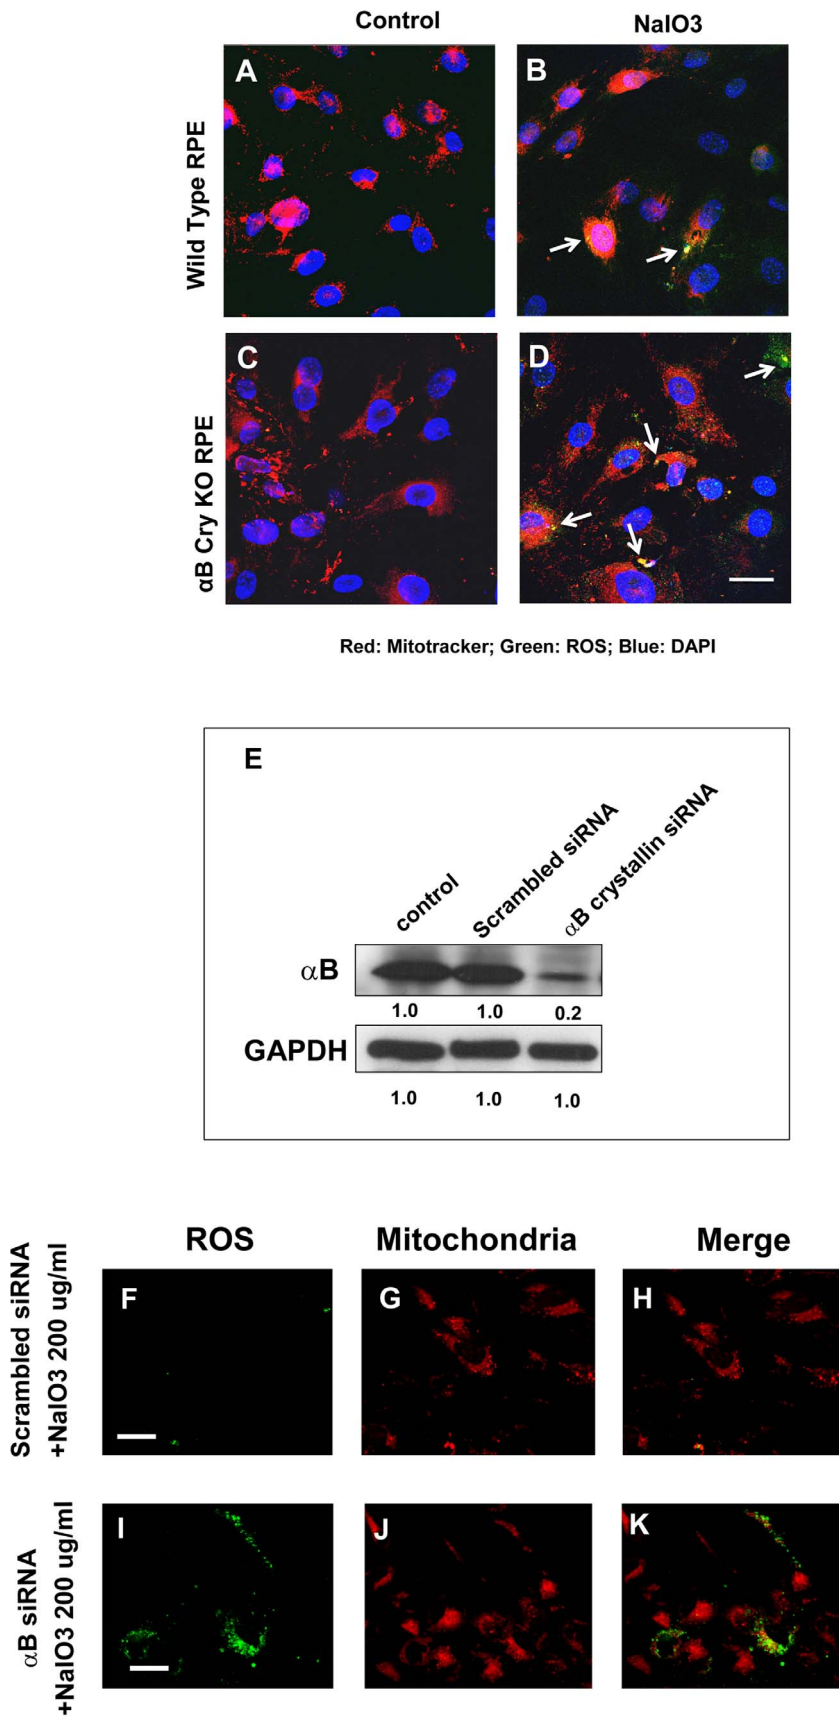

**Figure 5. Increased production of reactive oxygen species (ROS) in mouse primary RPE cells and human RPE cells transfected with  $\alpha$ B crystallin ( $\alpha$ B<sup>-/-</sup>) siRNA after NaIO<sub>3</sub> treatment.** Confluent mouse RPE cells from  $\alpha$ B<sup>-/-</sup> and WT mice were treated with 200  $\mu$ g/ml NaIO<sub>3</sub> for

24 h. In panels A–D, DAPI is shown in blue, ROS staining in green and mitotracker in red. ROS staining was observed in WT RPE cells treated with  $\text{NaIO}_3$  (A–B). RPE cells from  $\alpha\text{B}^{-/-}$  mice (C–D, see white arrows) showed increased accumulation of ROS that partially colocalized with mitochondria. For studies with human RPE cells,  $\alpha\text{B}$  crystallin was knocked down ( $\sim 80\%$ ) by siRNA transfection (Fig. 5E). Increased ROS production was observed in  $\alpha\text{B}$  crystallin si-RNA transfected human RPE cells with  $\text{NaIO}_3$  as compared to scrambled siRNA transfected cells which showed negligible ROS staining (I–K). (F–H). Scale bars represent  $20\ \mu\text{m}$  for A–D and  $10\ \mu\text{m}$  for F–K, respectively.  
doi:10.1371/journal.pone.0098275.g005

knockout of either  $\alpha\text{A}$  or  $\alpha\text{B}$  crystallin in RPE renders them more susceptible to oxidative stress [28]. Thus, it might be interesting to study the effects of double knockout of  $\alpha\text{A}$  and  $\alpha\text{B}$  crystallin on the extent of retinal degeneration in this model.

We used human RPE cultures *in vitro* to elucidate the mechanism of  $\text{NaIO}_3$  induced apoptosis under conditions of  $\alpha\text{B}$  crystallin deficiency. PPAR- $\gamma$ , a member of a nuclear receptor superfamily, plays a key role in numerous cellular functions and is

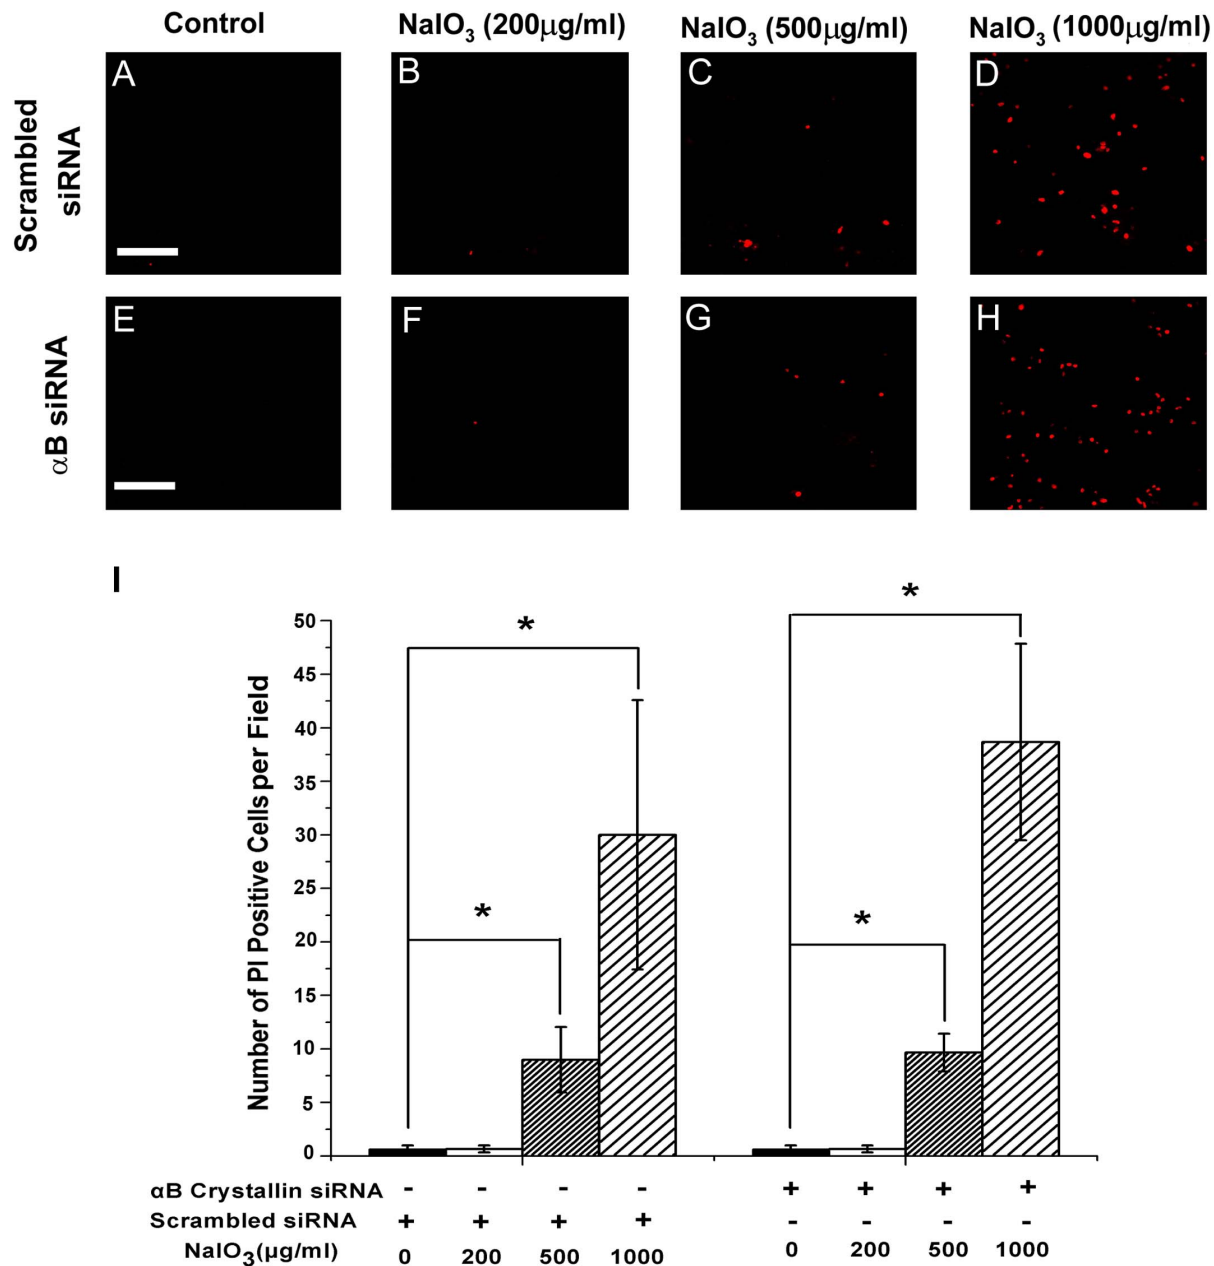

**Figure 6. Occurrence of necrosis with high doses of  $\text{NaIO}_3$  in human RPE cells.** Forty-eight hours after scrambled siRNA or  $\alpha\text{B}$  crystallin siRNA transfection, RPE cells were treated with 200, 500, 1000  $\mu\text{g}/\text{ml}$   $\text{NaIO}_3$  for 24 hours. Propidium iodide (PI) staining positive cells were determined in scrambled siRNA-transfected RPE cells (A–D) and  $\alpha\text{B}$  crystallin siRNA-transfected human RPE cells (E–H) treated with  $\text{NaIO}_3$ . Treatment with 500 and 1000  $\mu\text{g}/\text{ml}$  of  $\text{NaIO}_3$  resulted in increased PI positive cells both in control RPE cells and  $\alpha\text{B}$  crystallin siRNA pretreated human RPE cells (I). However, no significant differences were found between the number of PI positive cells in control RPE groups and  $\alpha\text{B}$  crystallin siRNA-transfected group (I). Data are mean  $\pm$  SEM from three individual experiments,  $\alpha\text{B}$  siRNA refers to  $\alpha\text{B}$  crystallin siRNA. \* $P < 0.05$ . Scale bar =  $40\ \mu\text{m}$ .  
doi:10.1371/journal.pone.0098275.g006



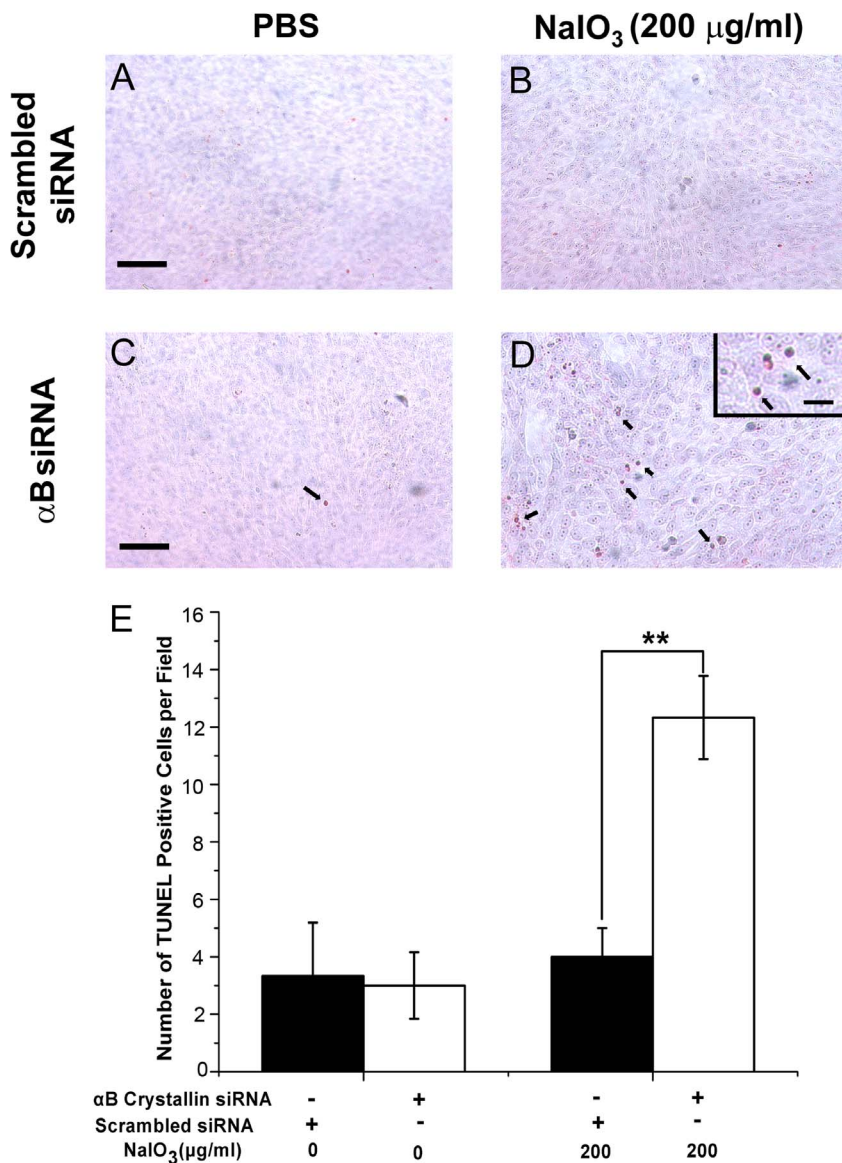

**Figure 7. Induction of apoptosis in RPE cells with low dose of NaIO<sub>3</sub>.** Forty-eight hours after scrambled siRNA or  $\alpha$ B crystallin siRNA transfection, human RPE cells were treated with 200  $\mu$ g/ml NaIO<sub>3</sub> for 24 hours. TUNEL staining was performed in scrambled siRNA-transfected human RPE cells (A, B) and  $\alpha$ B crystallin siRNA-transfected human RPE cells (C, D). Treatment with NaIO<sub>3</sub> resulted in increased TUNEL-positive cells with  $\alpha$ B crystallin siRNA-transfection as compared with scrambled siRNA controls. (arrows in inset in D and E). Data are mean  $\pm$  SEM from three individual experiments,  $\alpha$ B siRNA refers to  $\alpha$ B crystallin siRNA. \*\*P<0.01. Scale = 40  $\mu$ m for A–D and 10  $\mu$ m for inset in D. doi:10.1371/journal.pone.0098275.g007

a key regulator of mitochondrial biogenesis and of ROS metabolism [41]. We found that the expression of PPAR $\gamma$  protein in RPE cells increased after treatment with low dose NaIO<sub>3</sub>. The increase in PPAR $\gamma$  expression was significantly lower in  $\alpha$ B crystallin siRNA-transfected RPE cells treated with NaIO<sub>3</sub>. Furthermore, the PPAR $\gamma$  ligand A-PAF inhibited ROS production in  $\alpha$ B crystallin knockdown RPE cells treated with NaIO<sub>3</sub>. This finding of ROS inhibition by PPAR $\gamma$  ligand in RPE cells is consistent with some recent reports in other cell types. In mesangial cells, PPAR $\gamma$  ligand rosiglitazone abolished ROS generation during exposure to high glucose, while inhibition of PPAR $\gamma$  by GW9662 caused ROS generation in normal glucose [41]. Further,  $\alpha$ B crystallin was shown to effectively inhibit both ROS formation and apoptosis in cultured vascular endothelial cells [42]. The ROS-inhibitory function of PPAR $\gamma$  could arise

from the antioxidative properties reported for PPAR $\gamma$ . For example, it was shown recently that thiazolidinediones, synthetic ligands of PPAR $\gamma$ , effectively protected pancreatic beta-cells from oxidative stress by an increase in the expression of the antioxidative enzyme catalase [43]. Similarly, antioxidative, neuroprotective function for PPAR $\gamma$  was reported in a model of Parkinson's disease [44]. It will be of interest to investigate whether the observed antiapoptotic function of PPAR $\gamma$  in RPE is linked to any changes in endogenous antioxidant enzymes. In this context, our laboratory has shown that overexpression of  $\alpha$ B crystallin protects human RPE from oxidative and ER stress and upregulation of GSH and its biosynthetic enzymes are involved in this process [31,32,45].

The phosphoinositide 3-kinase (PI3K)-Akt pathway serves to coordinate the cellular response and ultimately determine cell fate

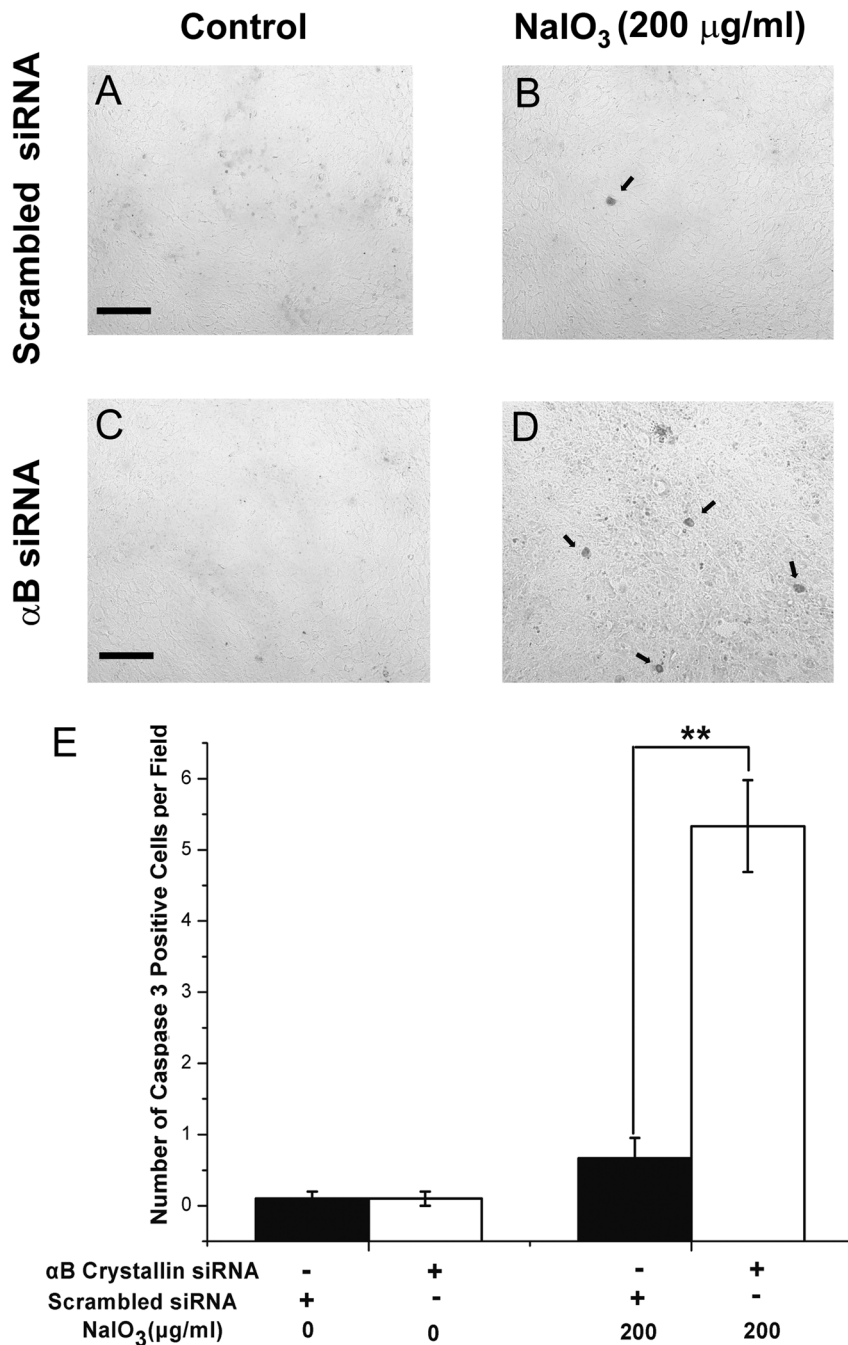

**Figure 8. Caspase 3 activation with  $\text{NaIO}_3$  treatment and increased activation with knockdown of  $\alpha$ B crystallin siRNA in human RPE cells.** Forty-eight hours after scrambled siRNA or  $\alpha$ B crystallin siRNA transfection, human RPE cells were treated with 200  $\mu$ g/ml  $\text{NaIO}_3$  for 24 hours. Cleaved caspase 3 staining was performed in scrambled siRNA-transfected human RPE cells (A, B) and  $\alpha$ B crystallin siRNA-transfected human RPE cells (C, D). Treatment with 200  $\mu$ g/ml of  $\text{NaIO}_3$  resulted in increased amount of cleaved caspase 3-positive cells with  $\alpha$ B crystallin siRNA-transfection vs. scrambled siRNA controls (E). Data are mean  $\pm$  SEM from three individual experiments,  $\alpha$ B siRNA refers to  $\alpha$ B crystallin siRNA in panels C and D. \*\*P < 0.01. Scale bar = 40  $\mu$ m.

doi:10.1371/journal.pone.0098275.g008

[46]. Akt activation enhances RPE cell survival. It was reported that  $\text{H}_2\text{O}_2$  induced PI3K and thereby activated Akt in human RPE cells [47]. AKT activation occurs through direct oxidation of phosphatase tensin homologue (PTEN) in acute oxidative stress [48]. We found in the present study that phosphorylated Akt and the signaling proteins downstream of AKT increased in RPE cells after treatment with  $\text{NaIO}_3$ . Further, knockdown of  $\alpha$ B crystallin

by siRNA suppressed the activation of Akt. Together, these data suggest  $\alpha$ B crystallin mediated protection of RPE cells from  $\text{NaIO}_3$  induced oxidative stress involves AKT. Working with HeLa cells, Pasupuleti et al. found evidence for activation of the PI3K/Akt cell survival pathway by alphaA crystallin by promoting phosphorylation of PDK1, AKT and PTEN [49]. It is of interest that Zhao et al reported that RPE dedifferentiation and hypertrophy in a model

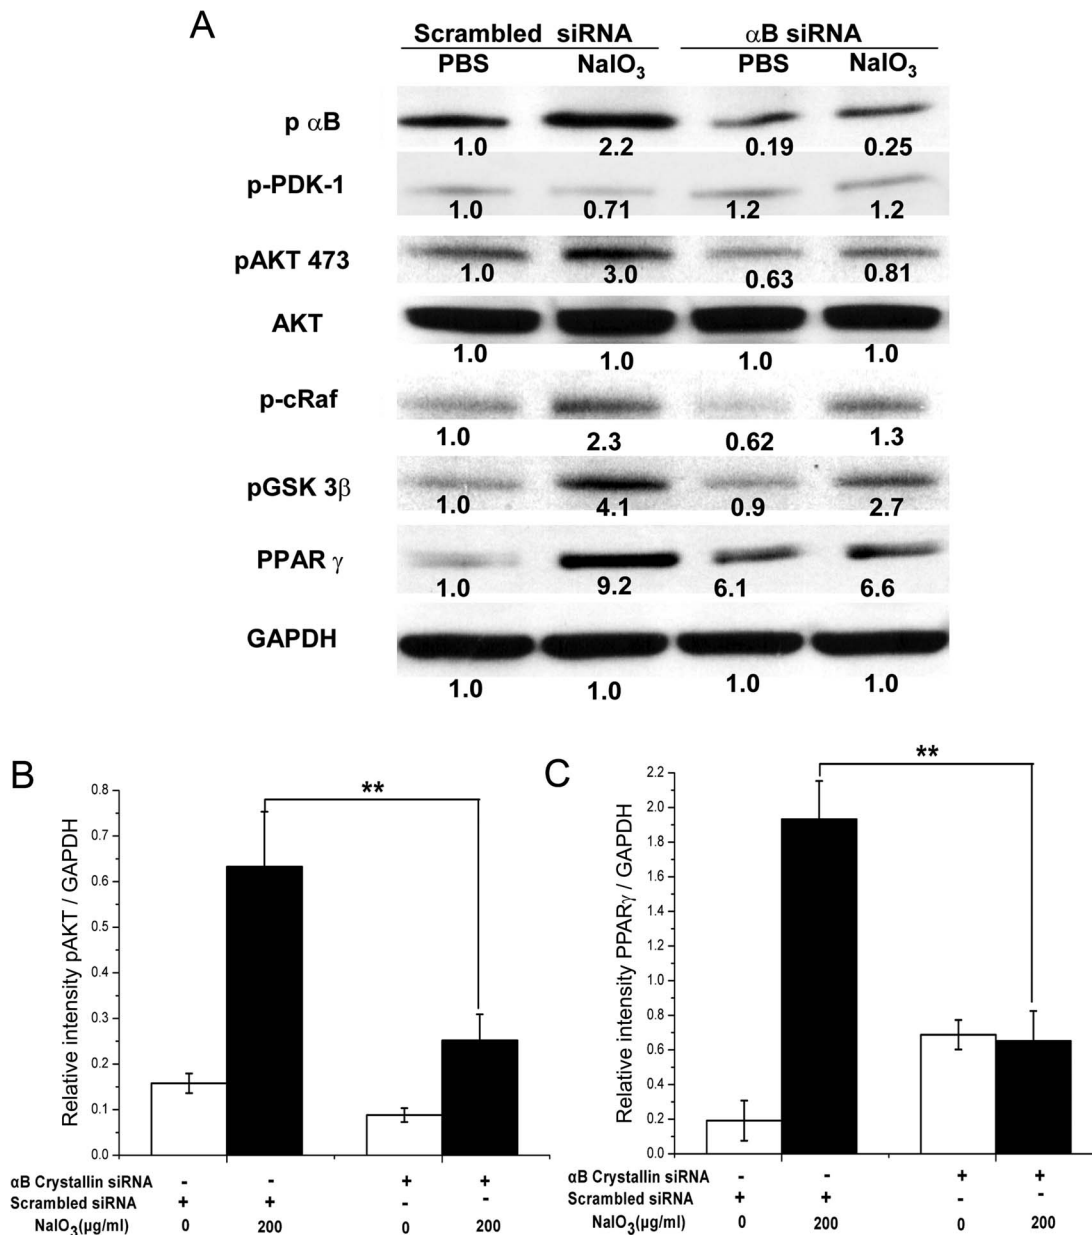

**Figure 9. Western blot analysis showing changes in expression of signaling molecules with NaIO<sub>3</sub>.** Forty-eight hours after scrambled siRNA or  $\alpha$ B crystallin siRNA transfection, human RPE cells were treated with 200  $\mu$ g/ml NaIO<sub>3</sub> for 24 hours. Cells were lysed and western blot was performed. (A) Phosphorylated level of AKT at serine 473 increased after the treatment of low dose (200  $\mu$ g/ml) NaIO<sub>3</sub> (B). The increase of phospho-AKT was lower in  $\alpha$ B crystallin siRNA-transfected RPE cells treated with NaIO<sub>3</sub>. Similar trends were found for phospho-GSK 3 $\beta$  and phospho-c-Raf, and PPAR $\gamma$ , and quantification is shown for PPAR $\gamma$ , in (C). However, no significant changes were found in phospho-PDK1, a kinase upstream of AKT. All experiments were performed three times and representative gels are presented. Protein expression levels were measured by BandsScan software, normalized to GAPDH, and labeled under each corresponding band. The bars for group B and C for pAKT and PPAR $\gamma$  are derived from 3 individual experiments.  $\alpha$ B siRNA refers to  $\alpha$ B crystallin siRNA. p $\alpha$ B in panel A refers to phosphorylated  $\alpha$ B crystallin. \*\*P<0.01. doi:10.1371/journal.pone.0098275.g009

of oxidative phosphorylation (OXPHOS) deficiency or NaIO<sub>3</sub> administration to B6 mice resulted in the stimulation of AKT/mammalian target of rapamycin (AKT/mTOR pathway) [7]. Further, evidence for RPE oxidative damage and a rapid reduction of RPE65 and several other RPE-characteristic proteins was found [7]. This led the authors to suggest that mTOR pathway inhibition could be an effective therapeutic strategy for retinal degenerative diseases involving RPE stress [50].

In conclusion, our data show that  $\alpha$ B crystallin plays a critical role in protection of NaIO<sub>3</sub> induced oxidative and retinal degeneration in part through upregulation of AKT phosphorylation and PPAR $\gamma$  expression.

## Materials and Methods

### Ethics statement

This study conforms to applicable regulatory guidelines at the University of Southern California, principles of human subject

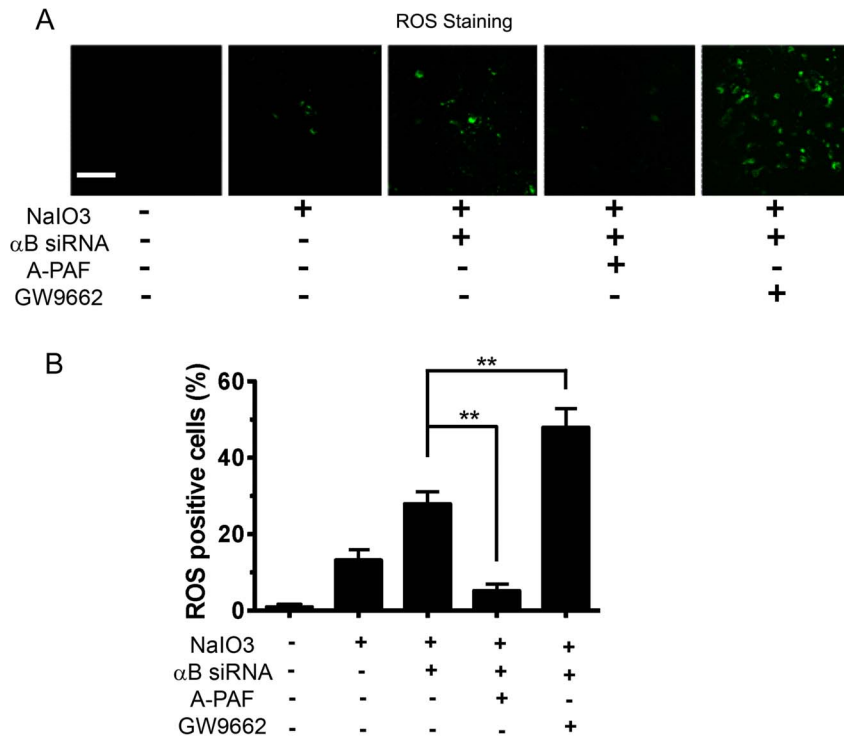

**Figure 10. Detection of reactive oxygen species (ROS) in the presence and absence of PPAR <sub>$\gamma$</sub>  ligand/antagonist.** Increased production of ROS was observed in RPE cells transfected with  $\alpha$ B crystallin siRNA upon NaIO<sub>3</sub> treatment as compared to control group. A-PAF, a PPAR <sub>$\gamma$</sub>  ligand, suppressed ROS production significantly ( $P < 0.01$ ) in  $\alpha$ B crystallin siRNA transfected cells treated with NaIO<sub>3</sub> (A). On the other hand, GW9662, a PPAR <sub>$\gamma$</sub>  antagonist significantly increased ROS positive cells in  $\alpha$ B crystallin siRNA transfected cells treated with NaIO<sub>3</sub>. ROS positive cells were quantified from four random images derived from 4 individual experiments.  $\alpha$ B siRNA refers to  $\alpha$ B Crystallin siRNA. (B). Scale bar = 40  $\mu$ m. \*\* $P < 0.01$ . doi:10.1371/journal.pone.0098275.g010

protection in the Declaration of Helsinki and principles of animal research in the Association for Research in Vision and Ophthalmology and Statement for the Use of Animals in Ophthalmic and Vision Research. All procedures with mice were performed in compliance with the Keck School of Medicine Institutional Animal Care and Use Committee approved protocols and the ARVO Statement for the Use of Animals in Ophthalmic and Vision Research. The Institutional Review Board (IRB) approved our use of human RPE cells under protocol #HS-947005 (valid until April 4, 2014). Human fetal eyes (16–18 weeks of gestation) were obtained from advanced Bioscience Resources Inc. (ABR, Alameda, CA) and written informed consent was obtained from all donors. The University of Southern California Institutional Animal Care committee approved our animal studies under protocol #11710 (valid until October 18, 2014).

The 129S6/SvEvTac wild type mice were purchased from Taconic Farms (Germantown, NY), and the  $\alpha$ B crystallin knockout mice in 129S6/SvEvTac background were obtained from the National Eye Institute [28,29]. Mice aged between 6 and 8 weeks maintained on a standard laboratory chow in an air-conditioned room equipped with a 12-hour light/12-hour dark cycle were used in all studies.

#### Experimental groups and NaIO<sub>3</sub> treatment

The mice were divided into four groups of seven mice per group: control wild type (PBS-treated WT), NaIO<sub>3</sub>-treated wild type (NaIO<sub>3</sub>-treated WT), control (PBS)  $\alpha$ B crystallin knockout mice, and NaIO<sub>3</sub>-treated  $\alpha$ B crystallin knockout mice.

Experiments to determine the dose and time-dependent effect of NaIO<sub>3</sub> were performed using doses of 20 mg/kg, 35 mg/kg,

50 mg/kg and 70 mg/kg body weight and duration of the study was one week to three weeks post NaIO<sub>3</sub> administration. Briefly, varying doses of sodium iodate (NaIO<sub>3</sub>; Sigma, St. Louis, MO) diluted with Phosphate buffered saline (PBS) were injected through the tail vein to restrained mice. Animals injected with equivalent volumes of PBS served as controls. Electroretinography and fundus photograph (see below) were assessed 21 days post-injection. After the tests were performed, mice were euthanized with CO<sub>2</sub> and their eyes processed for histology.

#### Electroretinography (ERG)

Mice were dark-adapted overnight and anesthetized by intraperitoneal injection of ketamine (100 mg/kg body weight) and xylazine (10 mg/kg body weight). Pupils were dilated with topical administration of 2.5% phenylephrine containing 0.5% tropicamide, and the cornea was anesthetized with 0.5% proparacaine. Mesopic ERGs were measured using a non-attenuated light stimulus. To measure cone responses, a 6 lux white background light was delivered through the other arm of the coaxial cable to suppress rod responses, and a non-attenuated light stimulus was applied. *a*-Wave amplitude was measured from the baseline to the trough of the *a*-wave, while *b*-wave amplitude was measured from the trough of the *a*-wave to the peak of the *b*-wave [51].

#### Fundus photography

Mice were anesthetized by administration of ketamine and xylazine as described above. Pupils were dilated and the cornea was anesthetized with 0.5% proparacaine. Images were captured

using a 35 mm Kowa hand-held fundus camera (Genesis, Tokyo, Japan).

### Histopathologic analysis

Eyes were enucleated and the anterior segments were removed. The remaining posterior eye cups were snap-frozen in tissue freezing medium (Triangle Biomedical Sciences, Durham, NC), Optimal cutting temperature (OCT). Cryostat Sections (8  $\mu$ m) were stained with hematoxylin and eosin (H&E), to assess the histopathologic changes.

Mouse retinal sections were scanned and retinal thickness was measured (Aperio ScanScope; Leica Biosystems) using Aperio software. Cell numbers in RPE layer, GCL layer, INL layer and ONL layer were determined by counting the nuclei in a 50  $\mu$ m wide region of retinal section located at equal distance from the ora serrata and the optic disc. For each group, three eyes were dissected. For each, three different regions were counted by Image J 4.3.2 (NIH Image). Average cell numbers and standard deviation were calculated using Statlab (SPSS Inc, Chicago, Illinois, USA).

### Human and mouse RPE cell cultures

All procedures conformed to the Declaration of Helsinki for research involving human subjects and were performed with the approval of the institutional review board (IRB) of the University of Southern California. Human RPE cells were isolated from fetal human eyes of 16–18 wks gestation (Advanced Bioscience Resources, Inc., Alameda, CA) as previously described [52,53]. Cells were cultured in DMEM (Fisher Scientific, Pittsburgh, PA) with 2 mM L-glutamine, 100 U/ml penicillin, 100  $\mu$ g/ml streptomycin (Sigma, St. Louis, MO), and 10% heat-inactivated fetal bovine serum (FBS, Irvine Scientific, Santa Ana, CA). The preparations contained >95% RPE cells (cytokeratin-positive). Cells used were from passages 2 to 4. Primary mouse RPE cells were isolated as previously described [54]. Primary mouse RPE cells were isolated from 4 to 6 week old WT (129S6/SvEvTac) and  $\alpha$ B crystallin knockout mice. RPE cells were cultured in DMEM containing 20% FBS and antibiotics until confluent and P3 cells were used for experiments.

### $\alpha$ B crystallin small interfering RNA (siRNA) transfection

Human RPE cells were switched to DMEM containing 0.5% FBS shortly before transfection. siRNA targeting  $\alpha$ B crystallin was diluted in DMEM without serum. HiPerFect Transfection Reagent (Qiagen, Valencia, CA) was added to the diluted siRNA and mixed by vortexing. After incubation for 10 min at room temperature, the complexes were added dropwise to RPE cells. The final siRNA concentration was 5 nM. The cells were harvested or fixed for further assay 24 hours later. The sequence for siRNA targeting  $\alpha$ B crystallin was: sense: r(CCA GGG AGU UCC ACA GGA A)dTdT; antisense:r(UUC CUG UGG AAC UCC CUG G) dTdT; nonsilencing control siRNA (scrambled siRNA): sense r(UUC UCC GAA CGU GUC ACG U) dTdT; antisense:r(ACG UGA CAC GUU CGG AGA A) dTdT. Forty-eight hours after transfection, *in vitro* effects of NaIO<sub>3</sub> were studied either with a fixed final concentration 200  $\mu$ g/ml added to the culture medium or at different doses as specified.

### Determination of ROS

To determine the compartmentalized generation of reactive oxygen species (ROS), mitochondria were labeled by a cell-permeable mitochondria-specific red fluorescent dye (Mito-Tracker, Molecular Probes); stained with carboxy-H<sub>2</sub>-DCFDA (Molecular Probes; 5  $\mu$ M for 1 h at 37 °C), and rapidly evaluated

by confocal microscopy (LSM510, Zeiss, Thornwood, NY, USA) as previously described [28,31]. A yellow color is observed when ROS (green) are colocalized in the mitochondria (red). In some experiments, the effect of treatment with Azelaoyl PAF (A-PAF) (Sigma, St. MO, USA), a PPAR $\gamma$  ligand at a concentration of 20  $\mu$ M and GW9662 (Cayman Chemicals, Ann Arbor, Mich, USA), a PPAR $\gamma$  antagonist, at a concentration of 10  $\mu$ M was determined [55,56].

### Determination of necrosis and apoptosis with NaIO<sub>3</sub>

Propidium Iodide (PI) stains DNA of necrotic cells [28,31]. Human RPE cells on an eight-well Lab-Tek™ chamber were treated with 10 mg/ml PI (Roche Applied Science) for 15 min at 25 °C in the dark. Cells were washed once with ice-cold PBS and observed under a laser scanning confocal microscope (LSM510, Zeiss, Thornwood, NY, USA).

Apoptosis (DNA fragmentation) was detected by the terminal deoxynucleotidyl transferase (TdT)-mediated dUTP-biotin nick end-labeling (TUNEL) method according to the manufacturer's protocol (In situ cell death detection kit-POD; Roche Applied Science). In short, after treatment with several doses of NaIO<sub>3</sub> at room temperature, RPE cells on eight-well Lab-Tek™ chambers were fixed in 1% paraformaldehyde solution and rinsed with PBS. Cells were then incubated with the TUNEL reaction mixture containing TdT and fluorescence UTP for 1 hour at 37°C in a humidified chamber. The nucleotides incorporated into DNA breaks were detected by applying anti-fluorescein peroxidase (POD) conjugate and peroxidase substrate.

### Immunocytochemistry of Cleaved Caspase-3

Human RPE cells on an eight-well Lab-Tek™ chamber were fixed in 4% paraformaldehyde for 30 min, and then permeabilized using 0.2% Triton-X 100 at 37°C for 15 min. Blocking was achieved by addition of 1% goat serum for 20 min. The samples were incubated with primary anti-cleaved caspase-3 antibody (Cell Signaling; 1:200) for 1 hr at room temperature. After washing with PBS, secondary biotinylated conjugated goat anti-rabbit antibody (1:400; Vector, Burlingame, CA, USA) was applied to the slides for 30 min at room temperature. After washing with PBS, streptavidin peroxidase (Invitrogen, Camarillo, CA, USA) was applied to the slides for 30 min. 3-Amino-9-Ethylcarbazole (AEC) was added to the slide (AEC Substrate Kit, Invitrogen, Camarillo) which produced a red colored deposit. Sections were examined and photographed with microscope (Leica, Germany).

### Western blot analysis

Cells were lysed, supernatants were collected, and proteins were resolved on Tris-HCl 10% polyacrylamide gels (Ready Gel; Bio-Rad, Hercules, CA) at 120 V. The proteins were transferred to PVDF blotting membrane (Millipore, Bedford, MA). The membranes were probed with antibody for phospho- $\alpha$ B crystallin (Ser 59, Stressgen), pan-AKT (C67E4, Cell Signaling), phospho-AKT (Ser 473, Cell Signaling), phospho-PDK1 (Ser 241, Cell Signaling), phospho-c-Raf (Ser 259, Cell signaling), phospho-GSK-3 $\beta$  (Ser 9, Cell Signaling), PPAR $\gamma$  (Santa Cruz Biotechnology) all at 1:1,000 dilution. Membranes were washed and incubated with a horseradish peroxidase (HRP)-conjugated secondary antibody (1:3,000, Vector Laboratories, Burlingame, CA) for 30 min at room temperature. Images were developed by adding ECL chemiluminescence detection solution (Amersham Pharmacia Biotech, Cleveland, OH). Monoclonal anti mouse GAPDH was used as the loading control.

## Statistics

All experiments were performed at least three times. The data were analyzed using the Student's t-test (amplitudes of ERG; number of nuclei of outer nuclear layer, inner nuclear layer and ganglion layer histopathology; ROS; TUNEL; Cleaved caspase 3; and western blot) or Chi-square (fundus photography, RPE layer histopathology) and  $P < 0.05$  was considered as significant.

## Supporting Information

**Figure S1** Fundus images showing time-dependent effect of a single dose of  $\text{NaIO}_3$  on wild type (WT) and  $\alpha$ B crystallin  $-/-$  ( $\alpha$ B $-/-$ ) mice. Representative images from a single mouse from WT and  $\alpha$ B $-/-$  groups are shown on the left accompanied by data for all experimental animals on the right. Fundus photography was taken one, two and three weeks after tail vein injection of PBS or 20 mg/kg  $\text{NaIO}_3$ . PBS-treated WT and PBS-treated  $\alpha$ B  $-/-$  did not exhibit any degenerative changes (data not shown).  $\text{NaIO}_3$ -treated WT mice did not show retinal degeneration at any time point (A). However,  $\text{NaIO}_3$ -treated  $\alpha$ B $-/-$  mice showed patchy retinal degeneration two and three weeks after  $\text{NaIO}_3$  injection

## References

- Gehrs KM, Anderson DH, Johnson LV, Hageman GS (2006) Age-related macular degeneration-emerging pathogenic and therapeutic concepts. *Ann Med* 38: 450–471.
- Ambati J, Fowler B (2012) Mechanisms of Age-related macular degeneration. *Neuron* 75: 26–39.
- Bird AC (2010) Therapeutic targets in age-related macular degeneration. *J Clin Invest* 120: 3033–3041.
- Klein ML, Ferris FL 3rd, Armstrong J, Hwang TS, Chew EY, et al. (2008) Retinal precursors and the development of geographic atrophy in age-related macular degeneration. *Ophthalmology* 115: 1026–1031.
- Ramkumar HL, Zhang J, Chan CC (2010) Retinal ultrastructure of murine models of dry age-related macular degeneration. *Prog Retin Eye Res* 29:169–90.
- Enzmann V, Row BW, Yamauchi Y, Kheirandish L, Gozal D, et al. (2006) Behavioral and anatomical abnormalities in a sodium iodate-induced model of retinal pigment epithelium degeneration. *Exp Eye Res* 82:441–448.
- Zhao C, Yasumura D, Li X, Mathes M, Lloyd M, et al. (2011) mTOR-mediated differentiation of the retinal pigment epithelium initiates photoreceptor degeneration in mice. *J Clin Invest* 121: 369–383.
- Markovets AM, Saprunova VB, Zhdankina AA, Fursova AZh, Kolosova NG (2011) Alterations of retinal pigment epithelium cause AMD like retinopathy in senescence-accelerated OXYS rats. *Aging (Albany, NY)* 3: 44–54.
- Kolosova NG, Muraleva NA, Zhdankina AA, Stefanova NA, Fursova AZ, et al. (2012) Prevention of age-related macular degeneration-like retinopathy by rapamycin in rats. *Amer J Pathol* 181:472–477.
- Malek G, Johnson LV, Mace ME, Saloupis P, Schmechel DE, et al. (2005) Apolipoprotein E allele-dependent pathogenesis: a model for age related macular degeneration. *Proc Natl Acad Sci USA* 102: 11900–11905.
- Ding JD, Johnson LV, Herrmann R, Farsi S, Smith SG, et al. (2011) Anti-amyloid therapy protects against retinal pigmented epithelium damage and vision loss in a model of age-related macular degeneration. *Proc Natl Acad Sci USA* 108: E279–87.
- Karan G, Lillo C, Yang Z, Cameron DJ, Locke KG, et al. (2005) Lipofuscin accumulation, abnormal electrophysiology, and photoreceptor degeneration in mutant ELOVL4 transgenic mice: a model for macular degeneration. *Proc Natl Acad Sci USA* 102:4164–4169.
- Zhu D, Wu J, Spee C, Ryan SJ, Hinton DR (2009) BMP4 mediates oxidative stress-induced cell senescence and is overexpressed in age-related macular degeneration. *J Biol Chem* 284: 9529–9539.
- Zhu D, Deng X, Xu J, Hinton DR (2009) What determines the switch between atrophic and neovascular forms of age related macular degeneration? -the role of BMP4 induced senescence. *Aging (Albany, NY)* 12: 740–745.
- Longbottom R, Fruttiger M, Douglas RH, Martinez-Barbera JP, Greenwood J (2009) Genetic ablation of retinal pigment epithelial cells reveals the adaptive response of the epithelium and impact on photoreceptors. *Proc Natl Acad Sci USA* 106:18728–18733.
- Kleinman ME, Kaneko H, Cho WG, Dridi S, Fowler BJ, et al. (2012) Short-interfering RNAs induce retinal degeneration via TLR3 and IRF3. *Mol Ther* 20: 101–108.
- Kaneko H, Dridi S, Tarallo V, Gelfand BD, Fowler BJ, et al. (2011) DICER1 deficit induces AluRNA toxicity in age-related macular degeneration. *Nature* 471: 325–330.
- Tarallo V, Hirano Y, Gelfand BD, Dridi S, Kerur N, et al. (2012) DICER1 loss and Alu RNA induce age-related macular degeneration via the NLRP3 inflammasome and MyD88. *Cell* 149: 847–859.
- Franco LM, Zulliger R, Wolf-Schnurrbusch UE, Katagiri Y (2009) Decreased visual function after patchy loss of retinal pigment epithelium induced by low-dose sodium iodate. *Invest Ophthalmol Vis Sci* 50:4004–4010.
- Ringvold A, Olsen EG, Flage T (1981) Transient breakdown of the retinal pigment epithelium diffusion barrier after sodium iodate: a fluorescein angiographic and morphological study in the rabbit. *Exp Eye Res* 33:361–369.
- Kiuchi K, Yoshizawa K, Shikata N, Moriguchi K, Tsubura A (2002) Morphologic characteristics of retinal degeneration induced by sodium iodate in mice. *Curr Eye Res* 25:373–379.
- Redfern WS, Storey S, Tse K, Hussain Q, Maung KP, et al. (2011) Evaluation of a convenient method of assessing rodent visual function in safety pharmacology studies: effects of sodium iodate on visual acuity and retinal morphology in albino and pigmented rats and mice. *J Pharmacol Toxicol Methods* 63: 102–114.
- Kannan R, Sreekumar PG, Hinton DR (2012) Novel roles for alpha crystallins in retinal function and disease. *Prog Retin Eye Res* 31: 576–604.
- Nakata K, Crabb JW, Hollyfield JG (2005) Crystallin distribution in Bruch's membrane-choroid complex from AMD and age-matched donor eyes. *Exp Eye Res* 80:821–826.
- De S, Rabin DM, Salero E, Lederman PL, Temple S, et al. (2007) Human retinal pigment epithelium cell changes and expression of alphaB-crystallin: a biomarker for retinal pigment epithelium cell change in age-related macular degeneration. *Arch Ophthalmol* 125: 641–645.
- Xi J, Farjo R, Yoshida S, Kern TS, Swaroop A, et al. (2003) A comprehensive analysis of the expression of crystallins in mouse retina. *Mol Vis* 9:410–419.
- Fort PE, Lampi KJ (2011) New focus on alpha-crystallins in retinal neurodegenerative diseases. *Exp Eye Res* 92: 98–103.
- Yaung J, Jin M, Barron E, Spee C, Wawrousek EF, et al. (2007) alpha-Crystallin distribution in retinal pigment epithelium and effect of gene knockouts on sensitivity to oxidative stress. *Mol Vis* 13:566–577.
- Brady JP, Garland DL, Green DE, Tamm ER, Giblin FJ (2001) AlphaB-crystallin in lens development and muscle integrity: a gene knockout approach. *Invest Ophthalmol Vis Sci* 42:2924–2934.
- Yaung J, Kannan R, Wawrousek EF, Spee C, Sreekumar PG, et al. (2008) Exacerbation of retinal degeneration in the absence of alpha crystallins in an in vivo model of chemically induced hypoxia. *Exp Eye Res* 86: 355–365.
- Dou G, Sreekumar PG, Spee C, He S, Ryan SJ (2012) Deficiency of alphaB crystallin augments ER Stress-induced apoptosis by enhancing mitochondrial dysfunction. *Free Radic Bio Med* 53: 1111–1122.
- Sreekumar PG, Spee C, Ryan SJ, Cole SPC, Kannan R, et al. (2012) Mechanism of RPE cell death in alpha-crystallin deficient mice: A novel and critical role for MRP1-mediated GSH efflux. *PLoS ONE* 7(3):e33420. doi:10.1371/journal.pone.0033420
- Sreekumar PG, Kannan R, Kitamura M, Spee C, Barron E, et al. (2010) AlphaB crystallin is apically secreted within exosomes by polarized human retinal pigment epithelium and provides neuroprotection to adjacent cells. *PLoS ONE* 5(10): e12578. doi:10.1371/journal.pone.0012578
- Ousman SS, Tomooka BH, van Noort JM, Wawrousek EF, O'Connor KC (2007) Protective and therapeutic role for alphaB-crystallin in autoimmune demyelination. *Nature* 448: 474–479.

(B). Arrow indicates the site of patchy retinal degeneration.  $\alpha$ B $-/-$  refers to  $\alpha$ B crystallin knockout mice. (TIF)

**Figure S2**  $\text{NaIO}_3$ -induced cell death in RPE layer of  $\alpha$ B crystallin knockout mouse retina as determined by TUNEL staining. TUNEL staining was performed after WT and  $\alpha$ B crystallin knockout mice were injected with 20 mg/kg  $\text{NaIO}_3$ . No TUNEL+ cells were observed in the RPE layer of WT retina while TUNEL+ cells could be easily identified in the RPE layer of  $\alpha$ B crystallin knockout retina (white arrow). Scale bar = 50  $\mu$ m. (TIF)

## Acknowledgments

We wish to thank Ernesto Barron for assistance with figures.

## Author Contributions

Conceived and designed the experiments: PZ RK DRH. Performed the experiments: PZ PGS CS GD. Analyzed the data: PZ PGS RK DRH. Wrote the paper: PZ RK DRH.

35. Brownell SE, Becker RA, Steinman L (2012) The protective and therapeutic function of small heat shock proteins in neurological diseases. *Front Immunol* 3: 74.
36. Rothbard JB, Kumellas MP, Brownell S, Adams CM, Su L et al (2012) Therapeutic effects of systemic administration of chaperone alphaB crystallin associated with binding proinflammatory plasma proteins. *J Biol Chem* 287: 9708–9721.
37. Organisciak D, Darrow R, Gu X, Barsalou L, Crabb JW (2006) Genetic, age and light mediated effects on crystallin protein expression in the retina. *Photochem Photobiol* 82:1088–1096.
38. Sakaguchi H, Miyagi M, Darrow RM, Crabb JS, Hollyfield JG (2003) Intense light exposure changes the crystallin content in retina. *Exp Eye Res* 76:131–133.
39. Kase S, He S, Sonoda S, Kitamura M, Spee C, et al. (2010) alphaB-crystallin regulation of angiogenesis by modulation of VEGF. *Blood*. 115:3398–3406.
40. Zhou P, Ye H-F, Jiang Y-X, Yang J, Zhu X-J, et al. (2012) AlphaA crystallin may protect against geographic atrophy-meta analysis of cataract vs cataract surgery for geographic atrophy and experimental studies. *PLoS ONE* 7(8): e43173, doi:10.1371/journal.pone.0043173
41. Whiteside C, Wang H, Xia L, Munk S, Goldberg HJ, et al. (2009) Rosiglitazone prevents high glucose-induced vascular endothelial growth factor and collagen IV expression in cultured mesangial cells. *Exp Diabetes Res* 2009:910783
42. Liu B, Bhat M, Nagaraj RH (2011) AlphaB-crystallin inhibits glucose-induced apoptosis in vascular endothelial cells. *Biochem Biophys Res Commun* 321:254–258.
43. Chung SS, Kim M, Lee JS, Ahn BY, Jung HS (2011) Mechanism for antioxidative effects of thiazolidinediones in pancreatic beta-cells. *Am J Physiol Endocrinol Metab* 311: E912–11.
44. Martin HL, Mounsey RB, Mustafa S, Sathe K, Teismann P (2012) Pharmacological manipulation of peroxisome proliferator activator receptor gamma (PPAR gamma) reveals a role for anti-oxidant protection in a model of Parkinson's disease. *Exp Neurol* 235: 528–538.
45. Sreekumar PG, Hinton DR, Kannan R (2012) Glutathione metabolism and its contribution to antiapoptotic properties of alpha-crystallins in the retina. In *Studies on Retinal and Choroidal Disorders* (Stratton RD, Hauswirth WW, Gardner TW, eds. Humana Press) Chapter 9, p. 181–202.
46. Datta SR, Dudek H, Tao Y, Masters S, Fu H (1997) Akt phosphorylation of BAD couples survival signals to the cell-intrinsic death machinery. *Cell* 91:231–241.
47. Yang P, Peairs JJ, Tano R, Jaffe GJ (2006) Oxidant-mediated Akt activation in human RPE cells. *Invest Ophthalmol Vis Sci* 47:4598–4606.
48. Kim JW, Kang KH, Burrola P, Mak TW, Lemke G (2008) Retinal degeneration triggered by inactivation of PTEN in the retinal pigment epithelium. *Genes Dev* 22: 3147–3157.
49. Pasupuleti N, Matsuyama S, Voss O, Doseff AI, Song K, et al. (2010) The anti-apoptotic function of human alphaA-crystallin is directly related to its chaperone activity. *Cell Death and Disease*. 1, e31; doi: 10.1038/cddis.2010.3
50. Zhu C, Vollrath D (2011) mTOR pathway activation in age-related retinal disease. *Aging* 3: 346–347.
51. Zhu X, Wu K, Rife L, Cawley NX, Brown B, et al. (2005) Carboxypeptidase E is required for normal synaptic transmission from photoreceptors to the inner retina. *J Neurochem*. 95: 1351–1362.
52. Sonoda S, Spee C, Barron E, Ryan SJ, Kannan R, et al. (2009) A protocol for the culture and differentiation of highly polarized human retinal pigment epithelial cells. *Nat Protoc* 4:662–673.
53. Sonoda S, Sreekumar PG, Kase S, Spee C, Ryan SJ, et al. (2010) Attainment of polarity promotes growth factor secretion by retinal pigment epithelial cells: relevance to age-related macular degeneration. *Aging* 2: 28–42.
54. Kerur N, Hirano Y, Tarallo V, Fowler BJ, Bastos-Carvalho A, et al. (2013) TLR-independent and P2X7-dependent signaling mediate Alu RNA-induced NLRP3 inflammasome activation in geographic atrophy. *Invest Ophthalmol Vis Sci* 54:7395–7401.
55. Murata T, He S, Hangai M, Ishibashi T, Xi XP, et al. (2000) Peroxisome proliferator-activated receptor-gamma ligands inhibit choroidal neovascularization. *Invest Ophthalmol Vis Sci* 41:2309–2317.
56. Cheng HC, Ho TC, Chen SL, Lai HY, Hong KF, et al. (2008) Troglitazone suppresses transforming growth factor beta-mediated fibrogenesis in retinal pigment epithelial cells. *Mol Vis* 14:95–104.
